# Supplementary material for: Hubs of knowledge: using the functional link structure in Biozon to mine for biologically significant entities
Source: Springer Nature journal article supplement (doi:10.1186/1471-2105-7-71), 2006-02-15
Supplement: 12859_2005_810_MOESM6_ESM.pdf [file 12859_2005_810_MOESM6_ESM.pdf]

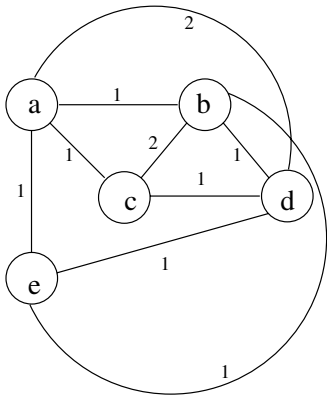

$$\mathbf{B} = \begin{pmatrix} 2 & 1 & 1 & 2 & 1 \\ 1 & 3 & 2 & 1 & 1 \\ 1 & 2 & 4 & 1 & 0 \\ 2 & 1 & 1 & 2 & 1 \\ 1 & 1 & 0 & 1 & 1 \end{pmatrix}$$
