# Supplementary material for: Hubs of knowledge: using the functional link structure in Biozon to mine for biologically significant entities
Source: Springer Nature journal article supplement (doi:10.1186/1471-2105-7-71), 2006-02-15
Supplement: 12859_2005_810_MOESM7_ESM.pdf [file 12859_2005_810_MOESM7_ESM.pdf]

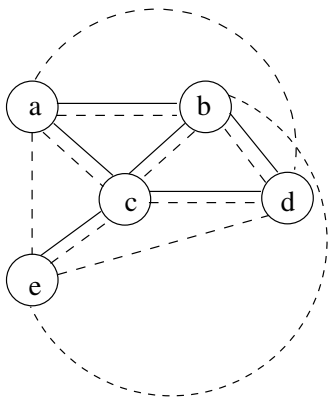

$$.85 \begin{pmatrix} 0 & .5 & .5 & 0 & 0 \\ .33 & 0 & .33 & .33 & 0 \\ .25 & .25 & 0 & .25 & .25 \\ 0 & .5 & .5 & 0 & 0 \\ 0 & 0 & 1 & 0 & 0 \end{pmatrix} + .15 \begin{pmatrix} .2 & .2 & .2 & .2 & .2 \\ .2 & .2 & .2 & .2 & .2 \\ .2 & .2 & .2 & .2 & .2 \\ .2 & .2 & .2 & .2 & .2 \\ .2 & .2 & .2 & .2 & .2 \end{pmatrix}$$

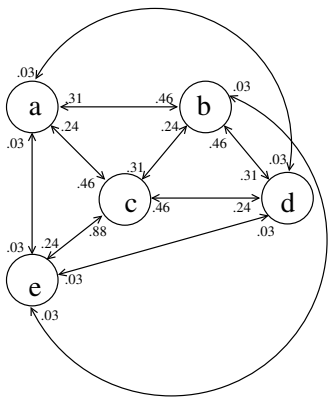

$$\begin{pmatrix} .03 & .455 & .455 & .03 & .03 \\ .3133 & .03 & .3133 & .3133 & .03 \\ .2425 & .2425 & .03 & .2425 & .2425 \\ .03 & .455 & .455 & .03 & .03 \\ .03 & .03 & .88 & .03 & .03 \end{pmatrix}$$
